# Supplementary material for: Study of a microwave induced plasma as a universal ion source for inorganic and organic mass spectrometry
Source: Royal Society of Chemistry journal article supplement (doi:10.1039/d4an00356j), 2024-01-01

## Supplementary Information

### Study of a Universal Ion Source for Inorganic and Organic Mass Spectrometry

Marc-Aurèle Boillat, Peter C. Hauser

*University of Basel, Department of Chemistry, Klingelbergstrasse 80, 4056 Basel, Switzerland*

#### Contents

|                                                                             |   |
|-----------------------------------------------------------------------------|---|
| Figure S-1: Calibration curve for $\text{Pb}(\text{NO}_3)_2$ .....          | 2 |
| Figure S-2: Emission spectrum centred at 425 nm.....                        | 2 |
| Figure S-3: Emission spectrum centred at 825 nm.....                        | 3 |
| Figure S-4: Specair fit of the OH-band at 310 nm under soft conditions..... | 3 |
| Figure S-5: Specair fit of the OH-band at 310 nm under hard conditions..... | 4 |
| Figure S-6: Boltzmann plot for soft conditions.....                         | 4 |
| Figure S-7: Boltzmann plot for hard conditions.....                         | 5 |

**Figure S-1: Calibration curve for  $\text{Pb}(\text{NO}_3)_2$** 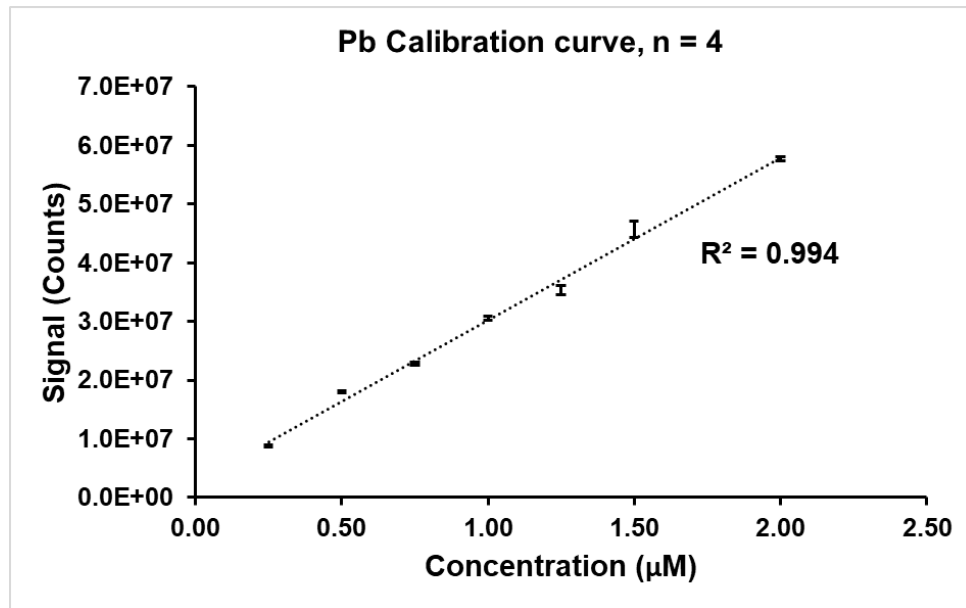**Figure S-2: Emission spectrum centred at 425 nm**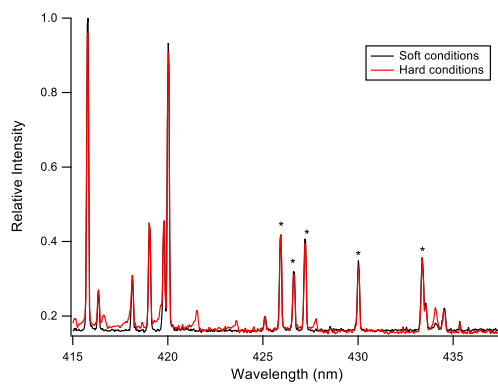

**Figure S-3: Emission spectrum centred at 825 nm**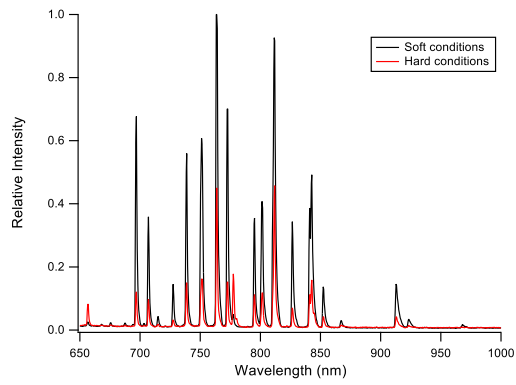**Figure S-4: Specair fit of the OH-band at 310 nm under soft conditions**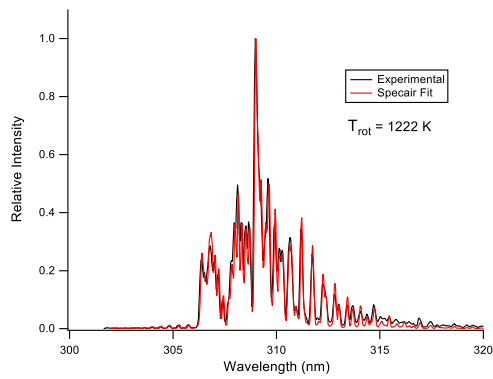

**Figure S-5: Specair fit of the OH-band at 310 nm under hard conditions**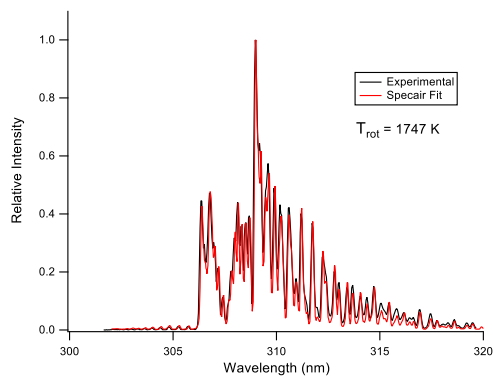**Figure S-6: Boltzmann plot for soft conditions**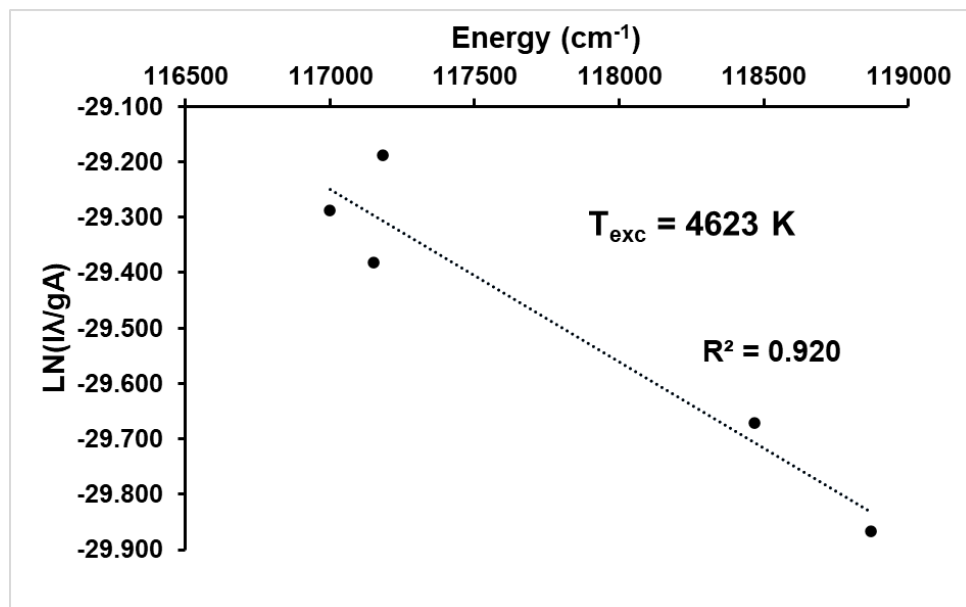

**Figure S-7: Boltzmann plot for hard conditions**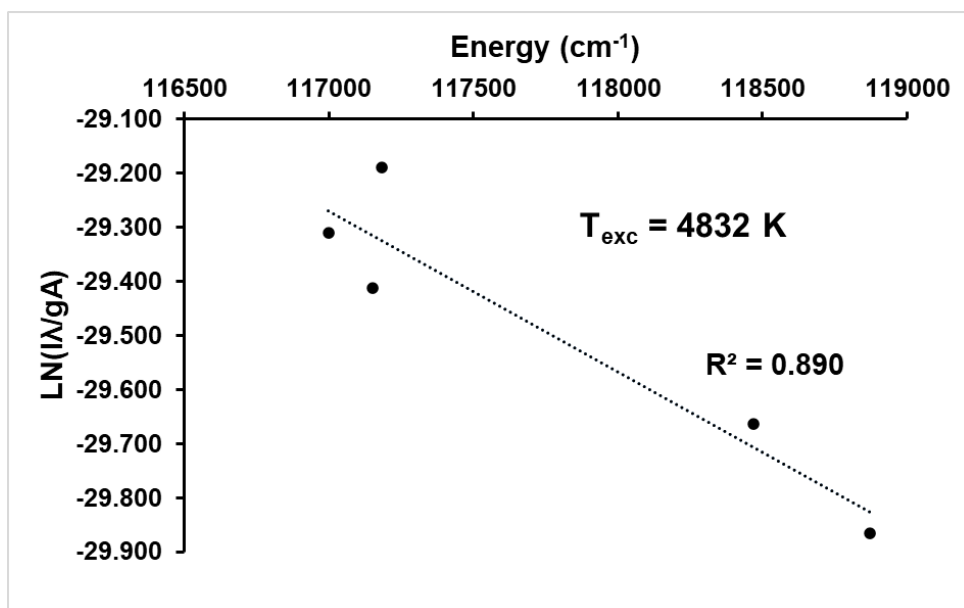

Supplement: d4an00356j1.pdf [file d4an00356j1.pdf]
